# Supplementary material
Source: PubMed Central journal article supplement (PMC4622849)

**Table S1 Human cancer genes harbouring somatic mutations in the three cell lines Hep3B, HepG2 and Huh-7**

Mutated cancer genes [61] were identified using the COSMIC Cell Lines database for Hep3B and Huh7. For HepG2, only mutations in CTNNB1 ( $\beta$ -catenin) and NRAS have been reported in the literature.

| <b>Hep3B</b> | <b>HepG2</b> | <b>Huh-7</b> |
|--------------|--------------|--------------|
| AXIN1        | CTNNB1       | FOXP1        |
| BCR          | NRAS         | ABI1         |
| CD74         |              | ALK          |
| CDKN2A       |              | AMER1        |
| CREB3L2      |              | CYLD         |
| CREBBP       |              | FAM22D       |
| ERCC3        |              | FANCD2       |
| HIST1H3B     |              | KMT2D        |
| MLL3         |              | MAX          |
| NFE2L2       |              | MLL3         |
| NUP214       |              | MYH9         |
| RB1          |              | PTPRC        |
| TRRAP        |              | RANBP17      |
|              |              | ROS1         |
|              |              | SYK          |
|              |              | TP53         |
|              |              | TPR          |
|              |              | UBR5         |

***Figure S1 Effects of AZD6244 or AZD8055 treatment on intracellular signaling***

HCC cell lines were incubated with increasing concentrations of AZD6244 or AZD8055 as indicated over 24 h. PI3K-AKT-mTOR and RAF-MEK-ERK signaling pathway activity was analyzed by western blot with antibodies directed against the indicated targets. HSC70 served as loading control.

***Figure S2 Effects of AZD6244 or AZD8055 proliferation of the three HCC cell lines***

HCC cells were seeded into 96-well plates and incubated with increasing concentrations of MEK inhibitor AZD6244 or mTOR inhibitor AZD8055. Controls were treated with DMSO only. Proliferation was analyzed after 72h by BrdU incorporation. Each data point represents mean of three independent experiments measured in triplicated, normalized to controls.

***Figure S3 Quantification of synergistic interactions between inhibitors targeting AKT (MK-2206), mTOR (AZD8055) and MEK (AZD6244)***

The interaction between two compounds was analysed using the method proposed by Chou and Talalay, as described in the Material and Methods section. Fractional Effect blots were computed based on the experiment as described in Fig. 1 for each drug combination and cell line. Combination Index (CI) values greater 1 indicate an antagonistic interaction; CI values below 1 indicate synergism.

***Figure S4 Relief of feedback inhibition on CRAF restores pERK1/2 signaling***

Huh7 cells were treated with AZD6244 for up to 48 hours, and cell lysates were prepared at the indicated time points, controls were treated with DMSO. RAF-MEK-ERK pathway activity was analyzed by western blot, and HSC70 served as loading control.

***Figure S5 HepG2 R6244 cell are cross resistant against allosteric MEK inhibitor PD0325901, but not against tyrosine kinase inhibitor Sorafenib***

HepG2 cells, as well as their AZD6244 resistant derivatives (HepG2 R6244) were seeded into 96-well plates and treated with increasing concentrations of Sorafenib or PD0325901, controls were treated with DMSO. Proliferation was analyzed after 72h by BrdU incorporation. Each data point represents three independent experiments, each performed in triplicates. Bars: SD.

**Fig. S1**

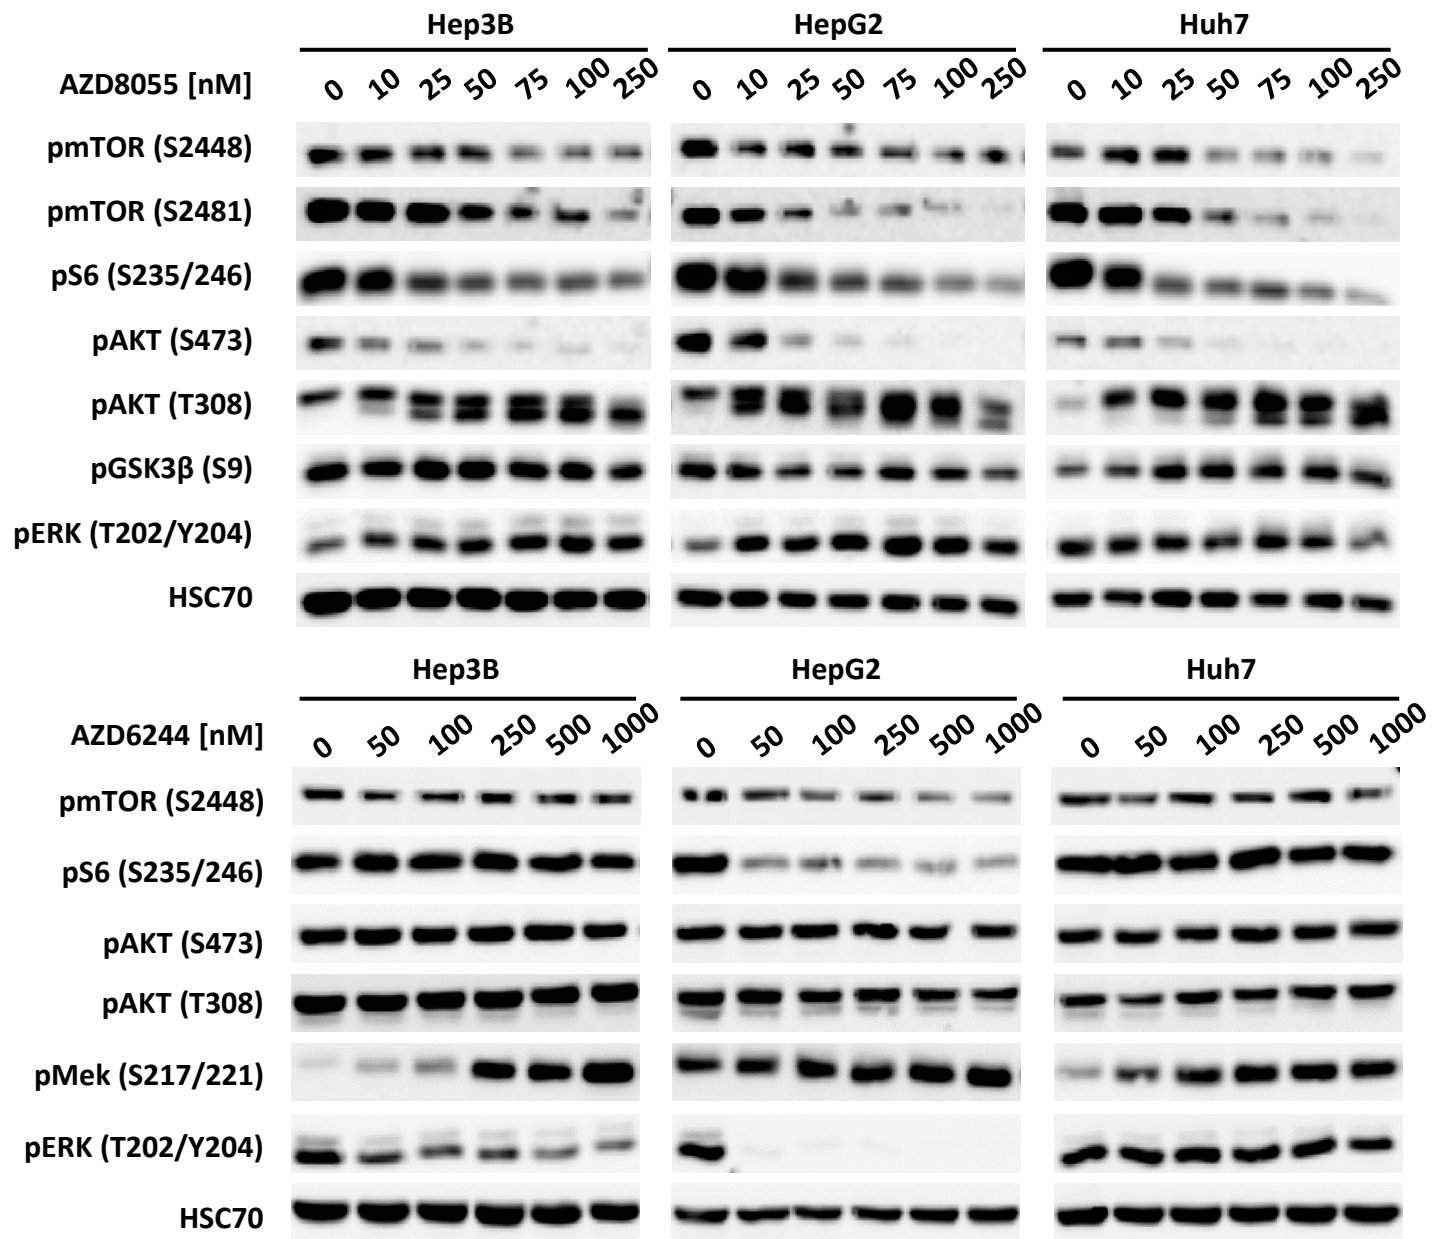

**Fig. S2**

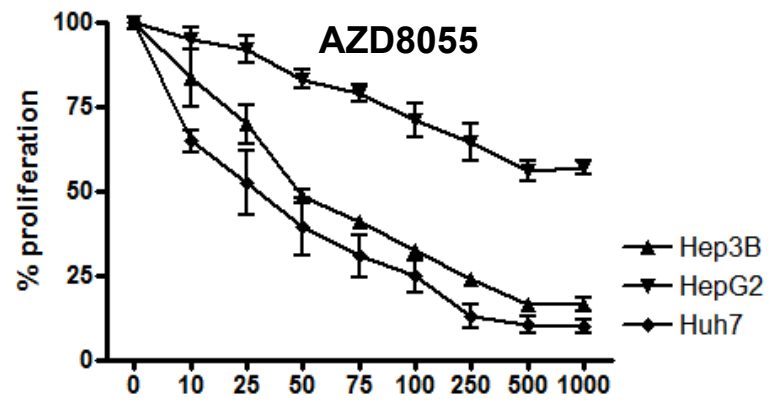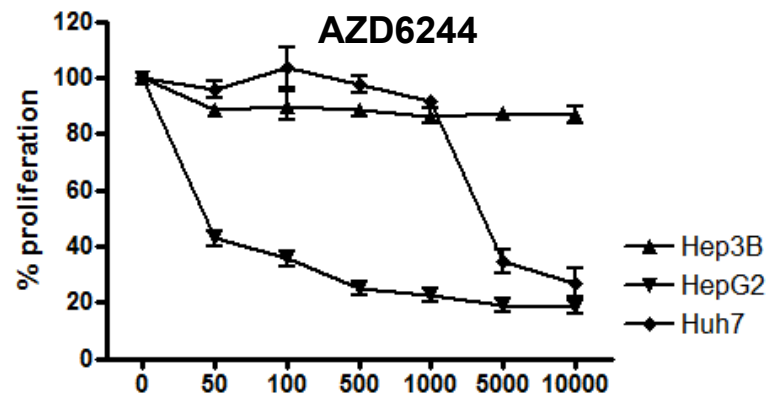

**Fig. S3**

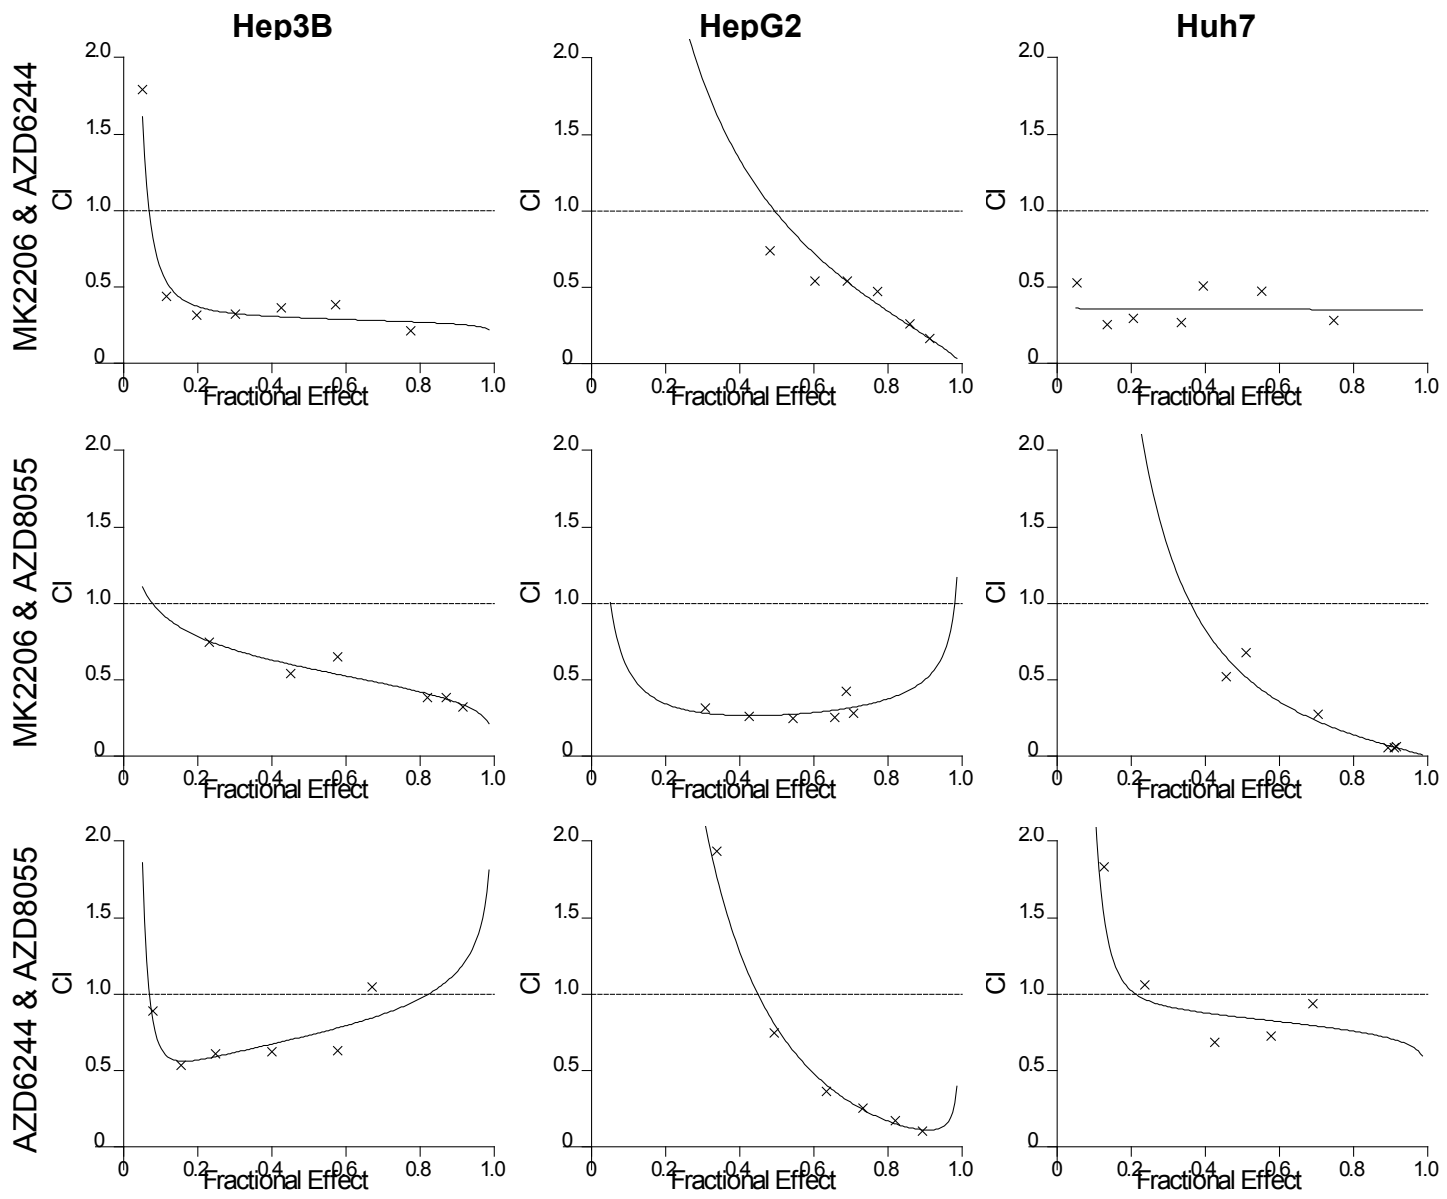

**Fig. S4**

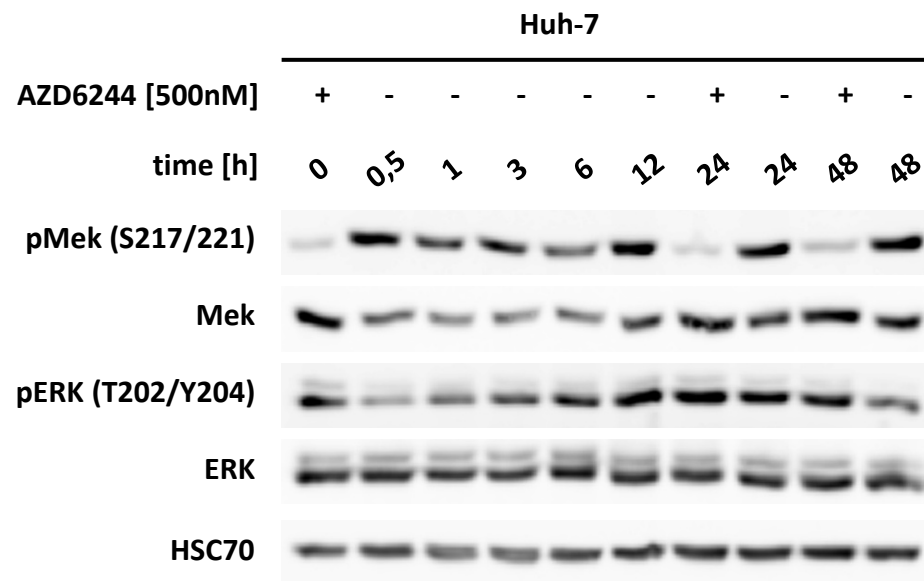

Fig. S5

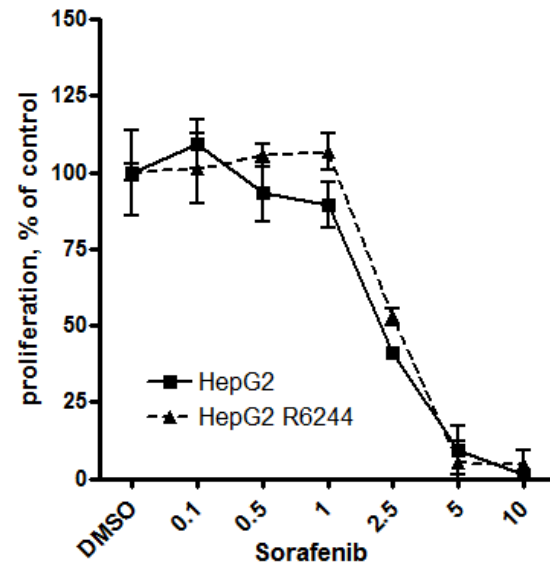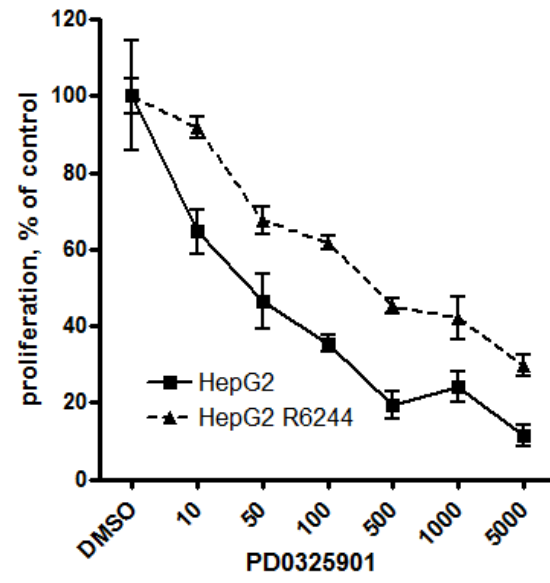

Supplement: jcav06p1195s1.pdf [file jcav06p1195s1.pdf]
